# Supplementary material for: A biofilm microenvironment-responsive one-for-all bactericidal nanoplatform for photothermal-augmented multimodal synergistic therapy of pathogenic bacterial biofilm infection
Source: Royal Society of Chemistry journal article supplement (doi:10.1039/d2tb01200f), 2022-01-01
Supplement: d2tb01200f1.pdf [file d2tb01200f1.pdf]

## Supporting Information

### **Biofilm microenvironment-responsive one-for-all bactericidal nanoplatform for photothermal-augmented multimodal synergistic therapy of pathogenic bacterial biofilm infection**

Ke Yang,<sup>†,a</sup> Luo Hai,<sup>†,b</sup> Zefeng Wang,<sup>a</sup> Huan Li,<sup>a</sup> Wenhua Yi,<sup>a</sup> Yuze Luo,<sup>a</sup> Junqin Li,<sup>a</sup>  
Le Deng,<sup>\*,a</sup> and Dinggeng He<sup>\*,a</sup>

*<sup>a</sup>State Key Laboratory of Developmental Biology of Freshwater Fish, College of Life Science, Hunan Normal University, Changsha 410081, China.*

*<sup>b</sup>Central Laboratory, National Cancer Center/National Clinical Research Center for Cancer/Cancer Hospital & Shenzhen Hospital, Chinese Academic of Medical Sciences & Peking Union Medical College, Shenzhen 518116, China.*

<sup>†</sup>These authors contributed equally to this work.

\*Corresponding author: [hedinggeng@hnu.edu.cn](mailto:hedinggeng@hnu.edu.cn) (D. He); [dengle@hunnu.edu.cn](mailto:dengle@hunnu.edu.cn) (L. Deng)

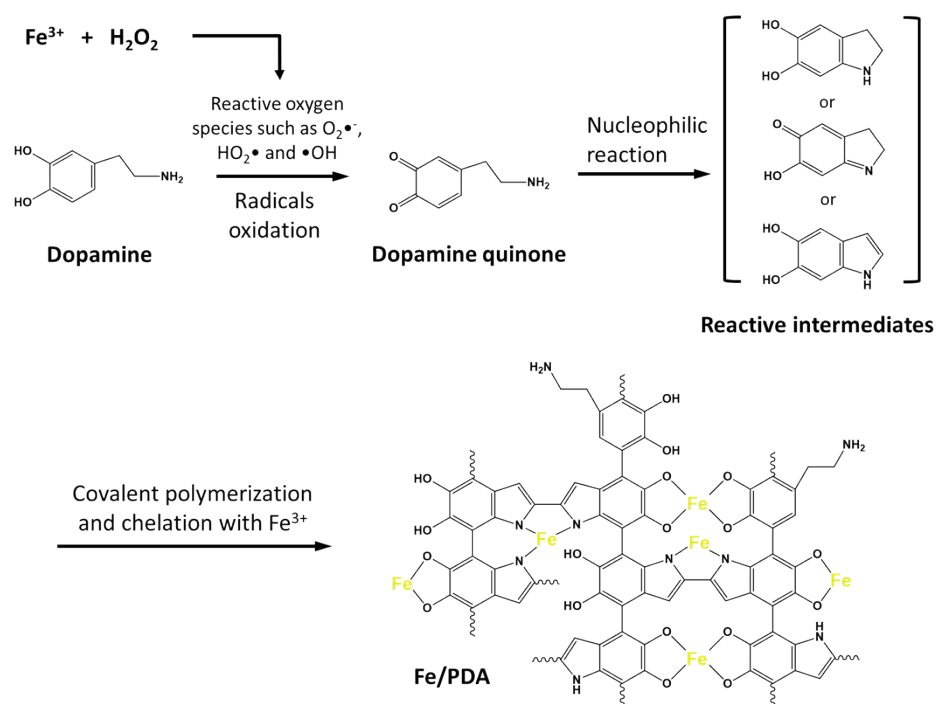

**Scheme S1.** The proposed mechanism for the formation of  $\text{Fe}^{3+}$ -doped PDA (Fe/PDA) by using  $\text{Fe}^{3+}/\text{H}_2\text{O}_2$  as a trigger.

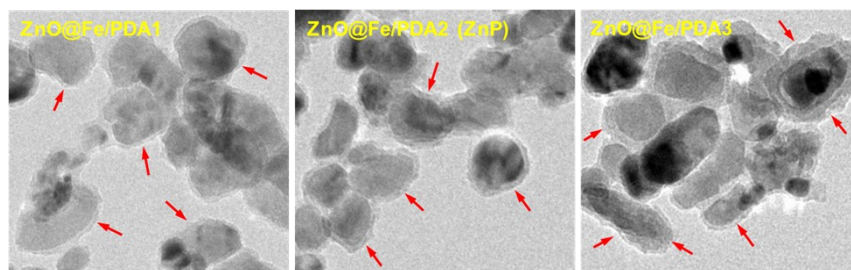

**Fig. S1.** TEM images of ZnO nanoparticles with different thicknesses of Fe/PDA coating layer. Red arrows indicate the Fe/PDA coating layer.

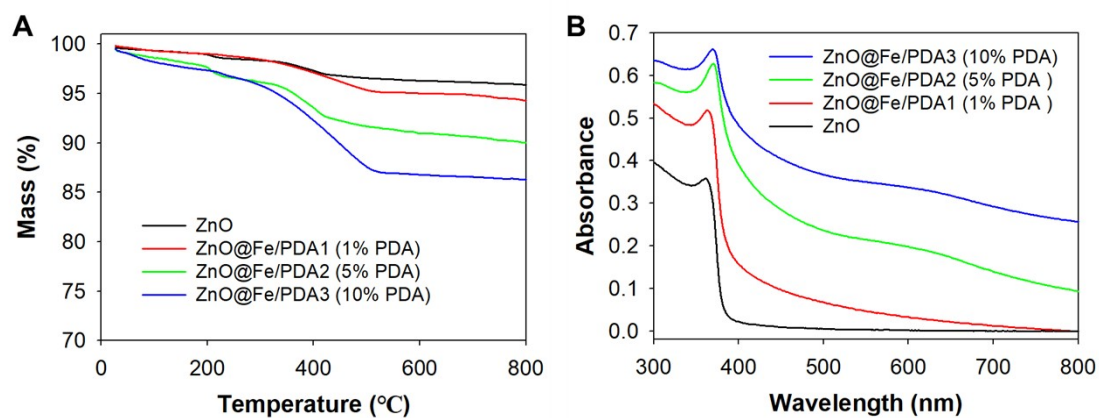

**Fig. S2.** TGA curves (A) and UV-vis spectra (B) of ZnO nanoparticles without and with different thicknesses of Fe/PDA coating layer.

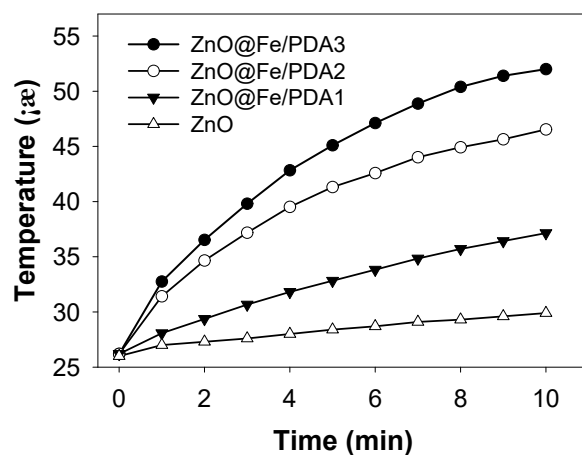

**Fig. S3.** Photothermal curves of ZnO nanoparticles without and with different thicknesses of Fe/PDA coating layer under 808 nm laser irradiation ( $1.45 \text{ W cm}^{-2}$ ) for 10 min.

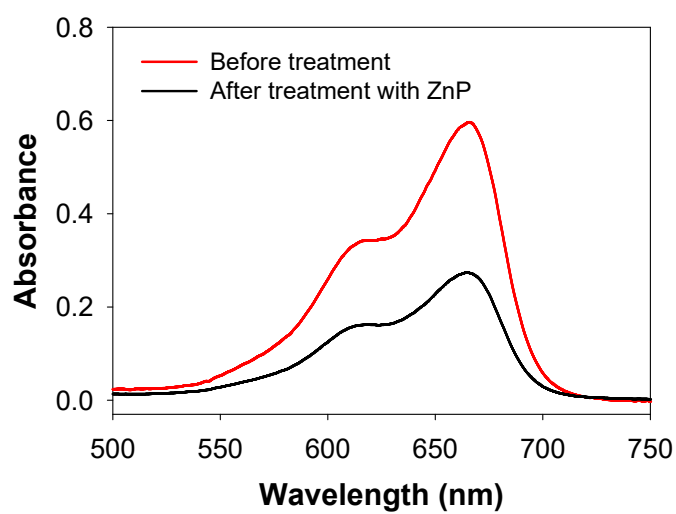

**Fig. S4.** UV-vis spectra of MB solution before and after treatment with ZnP.

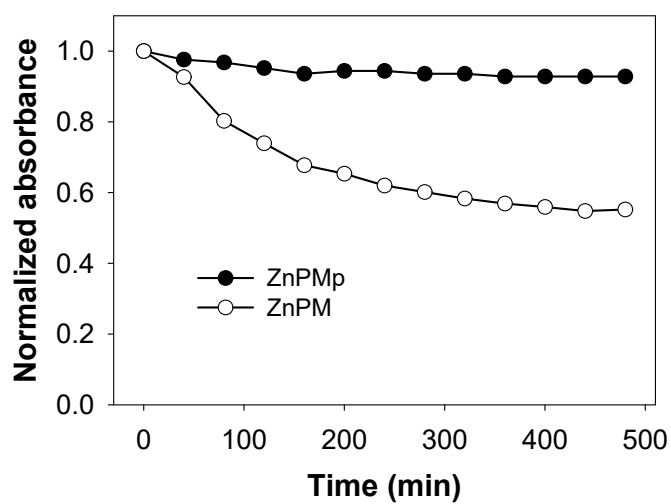

**Fig. S5.** Stability of MB loaded onto ZnPM and ZnPMp.

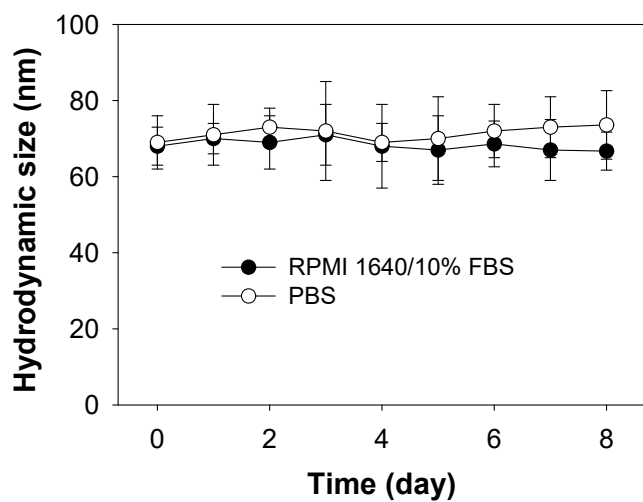

**Fig. S6.** Long-term stability of ZnPMp in PBS and RPMI 1640 with 10% FBS.

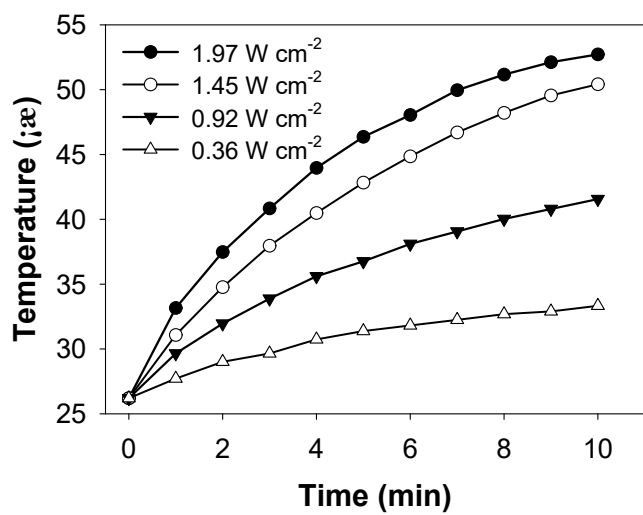

**Fig. S7.** Photothermal heating curves of ZnPMp ( $150 \mu\text{g mL}^{-1}$ ) receiving irradiation with different laser power densities for 10 min.

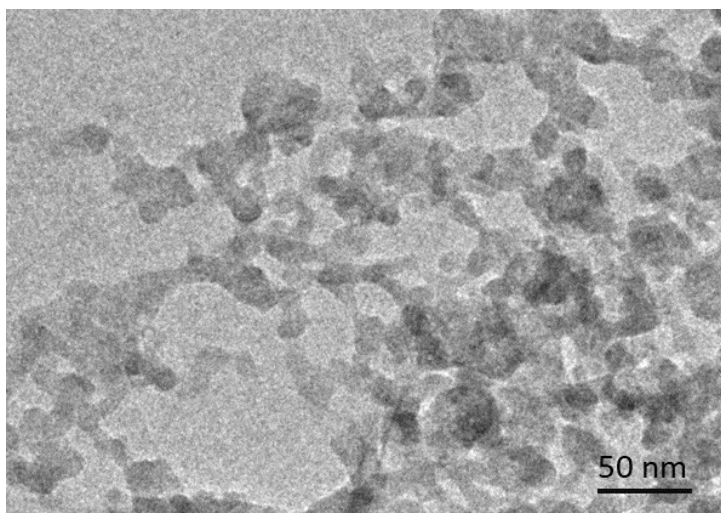

**Fig. S8.** TEM image of ZnPMp under acidic condition (pH 5.5) for 10 days.

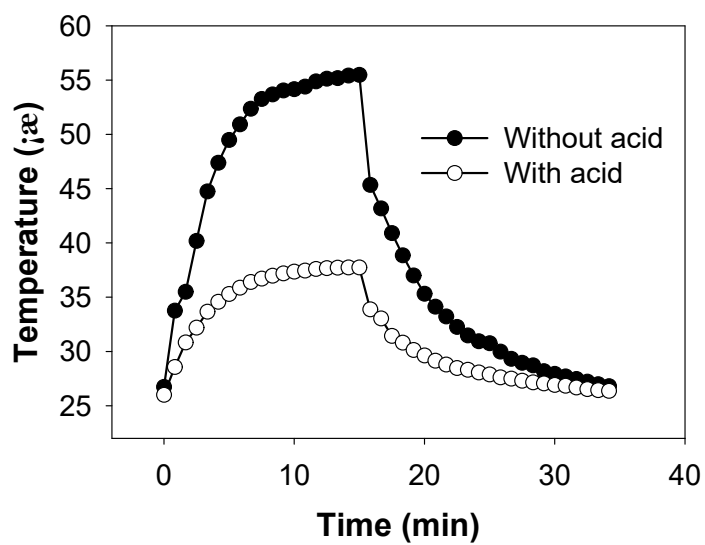

**Fig. S9.** Temperature profile of ZnPMp ( $200 \mu\text{g mL}^{-1}$ ) before and after treatment with PBS buffer (pH 5.5) for 10 days under 808 nm NIR laser irradiation ( $1.45 \text{ W cm}^{-2}$ ).

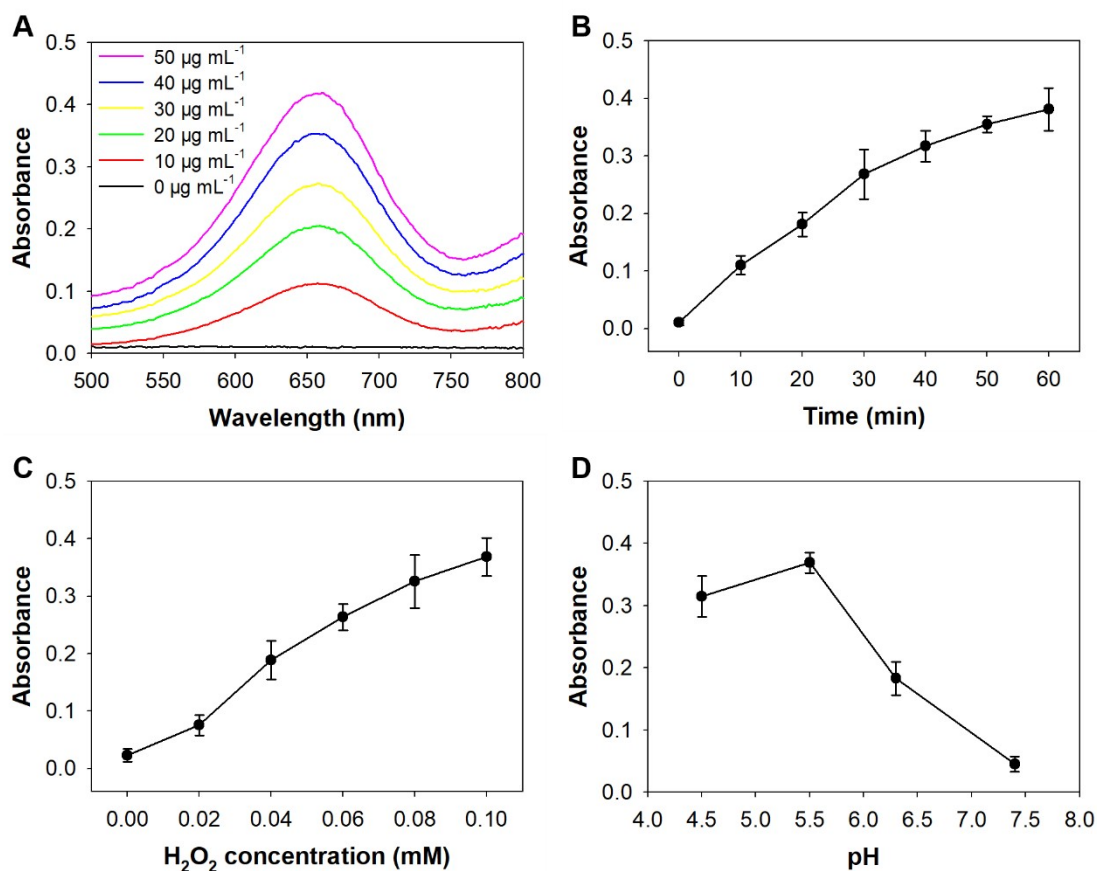

**Fig. S10.** (A) UV-vis spectra of TMB (10 mM) in the presence of ZnPMp with different concentrations. (B) Time-dependent oxidation of TMB induced by  $\bullet\text{OH}$  generation of ZnPMp with 0.1 mM  $\text{H}_2\text{O}_2$ . (C) UV-vis absorbances of TMB treated with ZnPMp in the presence of different concentrations of  $\text{H}_2\text{O}_2$ . (D) UV-vis absorbances of TMB co-incubated with ZnPMp at various pH values.

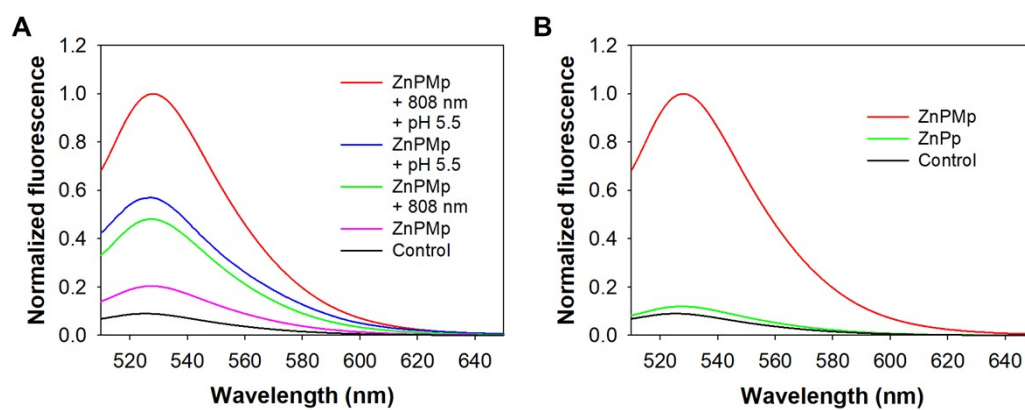

**Fig. S11.** (A) Normalized SOSG fluorescence of ZnPMp after with different treatments. (B) Normalized fluorescence of ZnPp and ZnPMp with 808 nm laser irradiation at pH 5.5.

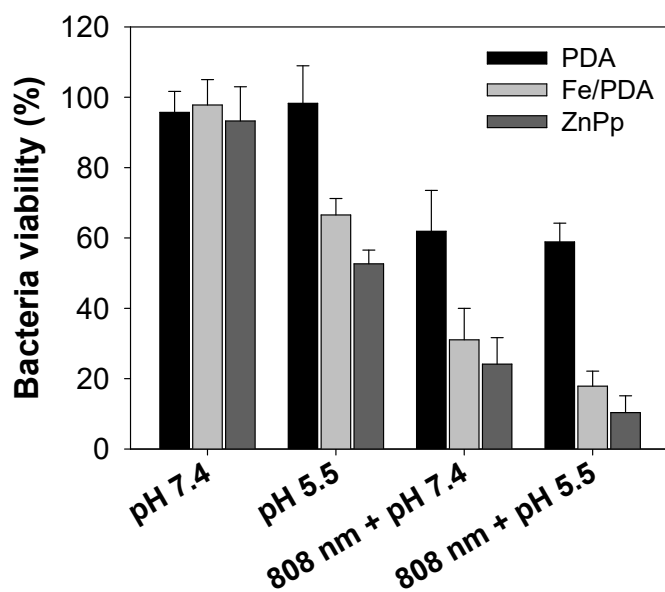

**Fig. S12.** Viabilities of *S. aureus* with various treatments in the presence of  $H_2O_2$  (0.05 mM).

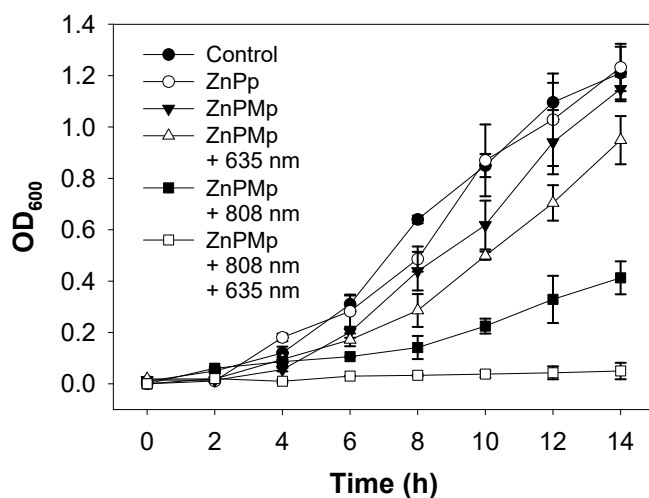

**Fig. S13.** Growth curves of *S. aureus* with various treatments.

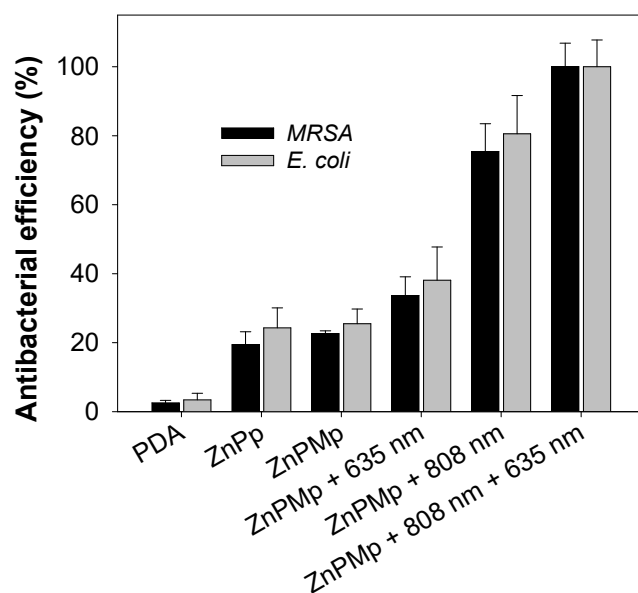

**Fig. S14.** The antibacterial efficiency of ZnPMp against MRSA and *E. coli* upon exposure to 808 nm and/or 635 nm laser for 10 min or not. The antibacterial effect of PDA and ZnPp on both MRSA and *E. coli* was also showed.

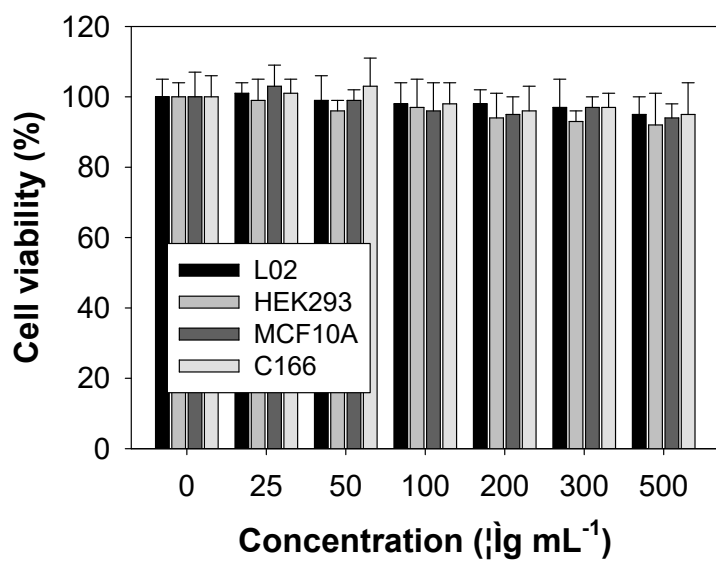

**Fig. S15.** Viabilities of L02, HEK293, MCF 10A and C166 cells after being treated with ZnPMp (0, 25, 50, 100, 200, 300, and 500 µg mL<sup>-1</sup>) for 48 h.

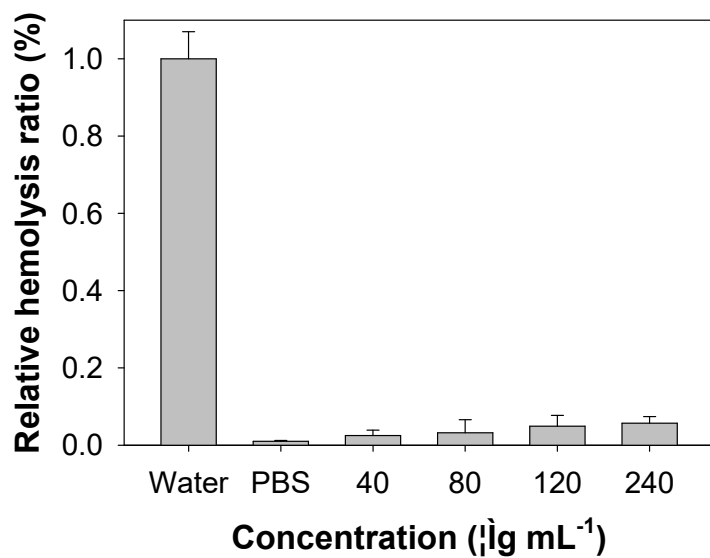

**Fig. S16.** Relative Hemolysis ratio of red blood cells (RBCs) after incubation with water, PBS and different concentrations of ZnPMp for 4 h.

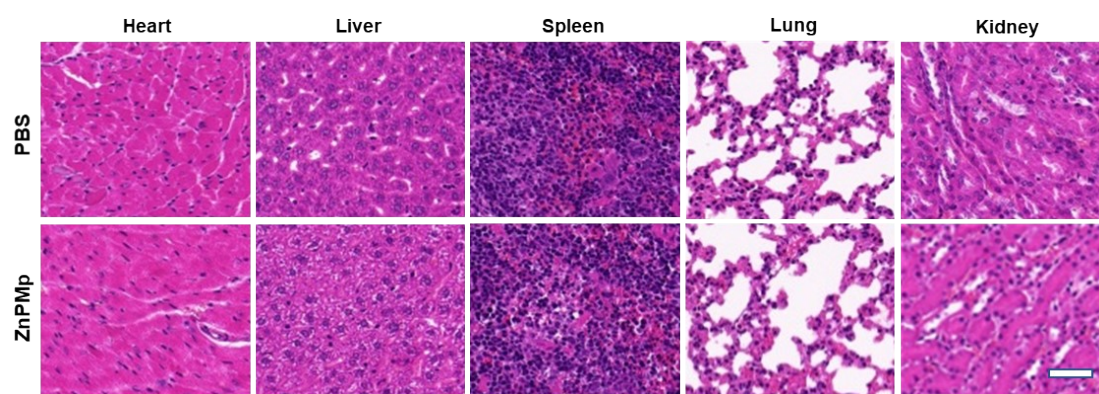

**Fig. S17.** H&E staining images of major organs (heart, liver, spleen, lung, and kidney) from mice treated with PBS and ZnPMp after 2 weeks. Scale bar: 50  $\mu\text{m}$ .

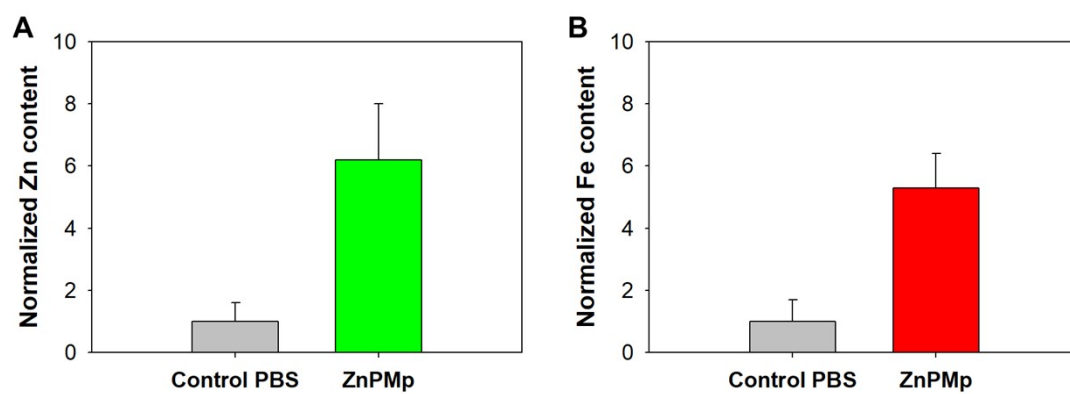

**Fig. S18.** Normalized Zn (A) and Fe (B) contents in the infection sites of mice after being treated with and without ZnPMp ( $0.5 \text{ mg mL}^{-1}$ ).

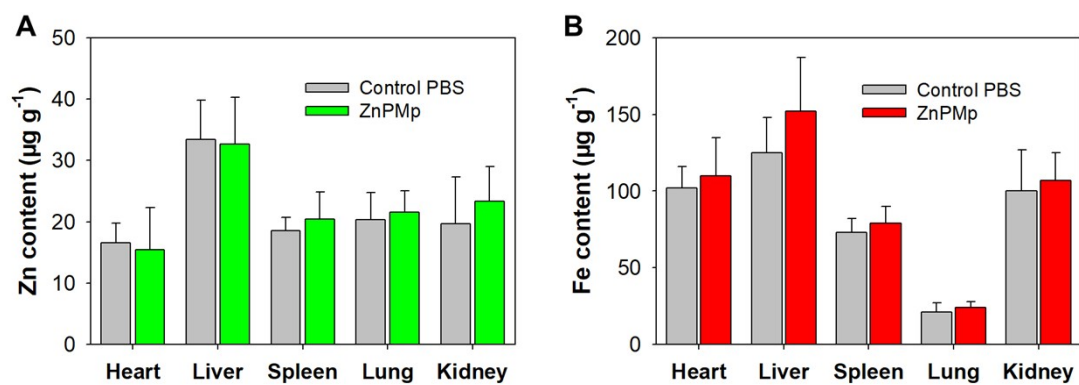

**Fig. S19.** The *in vivo* biodistribution of Zn (A) and Fe (B) elements in major organs (including heart, liver, spleen, lung and kidney) of mice after being subcutaneously injected with ZnPMp ( $0.5 \text{ mg mL}^{-1}$ ) for 14 days.

## Supplementary Tables

**Table S1.** Physiochemical properties of ZnO@Fe/PDA with different amounts of DA added.

| Samples     | Added DA<br>(%, w/w) | Capped PDA<br>(%, w/w) | Size (nm) <sup>a</sup> | PDI <sup>b</sup> | Zeta potential<br>(mV) | The thickness<br>of PDA (nm) |
|-------------|----------------------|------------------------|------------------------|------------------|------------------------|------------------------------|
| ZnO         | 0                    | 0                      | 44.1 ± 11.4            | 0.14             | -14.2 ± 3.5            | 0                            |
| ZnO@Fe/PDA1 | 1                    | 0.9                    | 45.7 ± 13.4            | 0.21             | -19.4 ± 2.8            | 1.6 ± 0.6                    |
| ZnO@Fe/PDA2 | 5                    | 4.1                    | 49.8 ± 16.1            | 0.18             | -24.3 ± 4.7            | 5.7 ± 2.1                    |
| ZnO@Fe/PDA3 | 10                   | 6.7                    | 54.3 ± 14.8            | 0.24             | -29.7 ± 5.3            | 10.2 ± 3.6                   |

<sup>a</sup>Determined by dynamic light scattering (DLS). <sup>b</sup>PDI, polydispersity index.

**Table S2.** Sample identifications.

| Samples           | Description                                     |
|-------------------|-------------------------------------------------|
| ZnO@Fe/PDA1       | Fe/PDA-capped ZnO nanoparticles (added 1% PDA)  |
| ZnO@Fe/PDA2 (ZnP) | Fe/PDA-capped ZnO nanoparticles (added 5% PDA)  |
| ZnO@Fe/PDA3       | Fe/PDA-capped ZnO nanoparticles (added 10% PDA) |
| ZnPp              | PEG-modified ZnO@Fe/PDA2 (ZnP)                  |
| ZnPM              | MB-loaded ZnO@Fe/PDA2                           |
| ZnPMP             | PEG-modified and MB-loaded ZnO@Fe/PDA2          |
| PDA-MB            | MB-loaded PDA nanoparticles                     |
